# Supplementary material for: Treatment of Cells and Tissues with Chromate Maximizes Mitochondrial 2Fe2S EPR Signals
Source: MDPI journal article supplement (doi:10.3390/ijms20051143), 2019-03-06

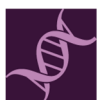

# Treatment of Cells and Tissues with Chromate Maximizes Mitochondrial 2Fe2S EPR Signals

William E. Antholine <sup>1,\*</sup>, Jeannette Vasquez-Vivar <sup>1</sup>, Brendan J. Quirk <sup>2</sup>, Harry T. Whelan <sup>2</sup>, Pui Kei Wu <sup>3</sup>, Jong-In Park <sup>3</sup>, and Charles R. Myers <sup>4</sup>

<sup>1</sup> Department of Biophysics, Medical College of Wisconsin, Milwaukee, WI 53226, USA; jvvivar@mcw.edu

<sup>2</sup> Departments of Neurology and Pediatrics, Medical College of Wisconsin, Milwaukee, WI 53226, USA; bquirk@mcw.edu; hwhelan@mcw.edu

<sup>3</sup> Department of Biochemistry, Medical College of Wisconsin, Milwaukee, WI 53226, USA; jipark@mcw.edu; pkwu@mcw.edu

<sup>4</sup> Department of Pharmacology and Toxicology, Medical College Wisconsin, WI 53226, USA; cmyers@mcw.edu

\* Correspondence: wantholi@mcw.edu; Tel.: +1-414-955-4032

## Supplementary Figures

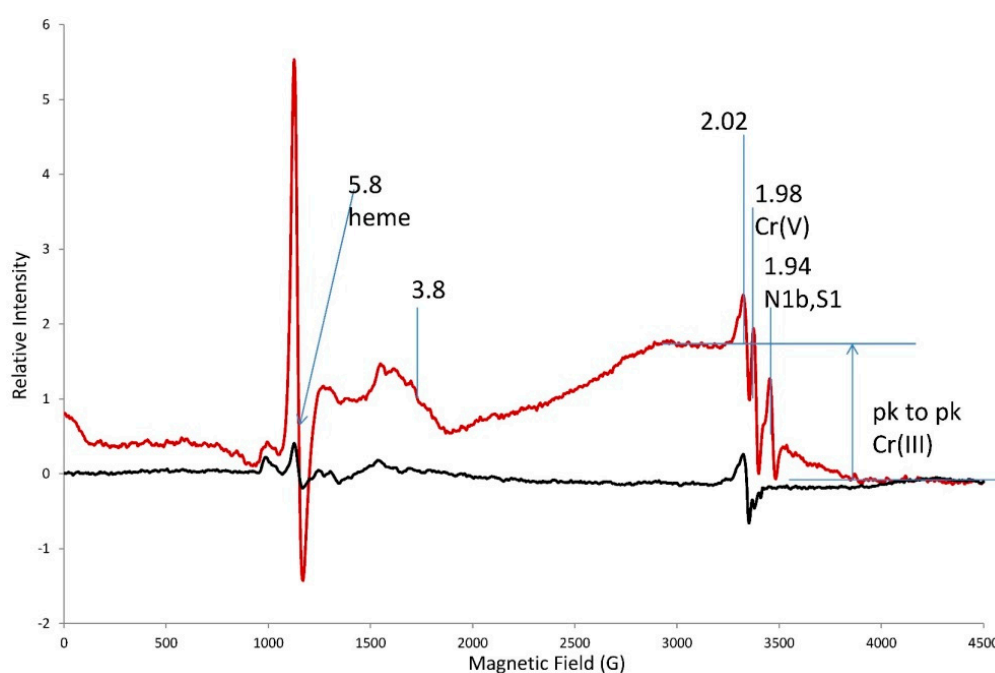

**Figure S1.** EPR spectra for white cells (black) plus 400  $\mu$ M chromate (red). Cells incubated at 37 °C for 3 h. Vertical lines indicate g-values for heme (5.8), a line not assigned (3.8), lines from a superposition of several sites (2.02), Cr(V) (1.98), and N1b and S1 (1.94–1.93). The arrow indicates the peak-to-peak height. This signal is tentatively assigned to superposition of Cr(III) complexes. (Note: The line shape suggests absorption or passage conditions.) Spectrometer conditions: microwave freq., 9.387 GHz; temp., 10 K, mod. amp., 5 G; microwave power, 5 mW; sweep time, 83.89 s; time constant, 81.82 ms; nine scans.

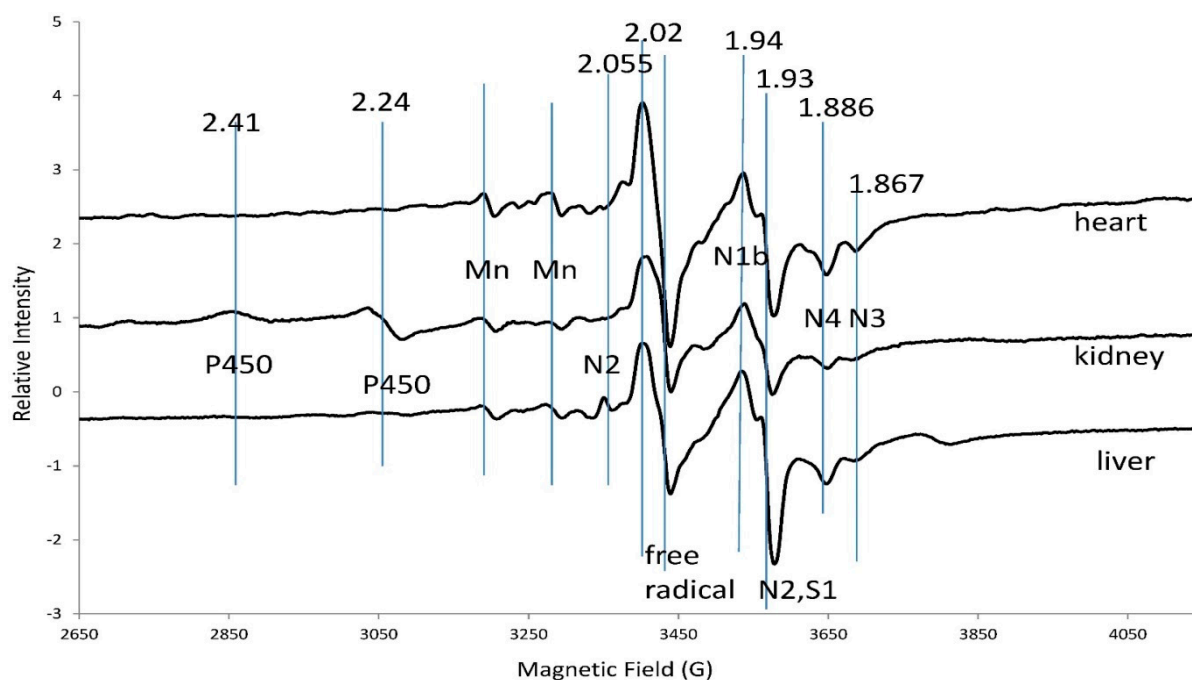

**Figure S2.** EPR spectra for liver tissue (bottom), kidney tissue (middle), and heart tissue (top). The vertical lines indicate the g-values for EPR lines from Complex I (N2, N1b, N3, N4) and Complex II (S1).

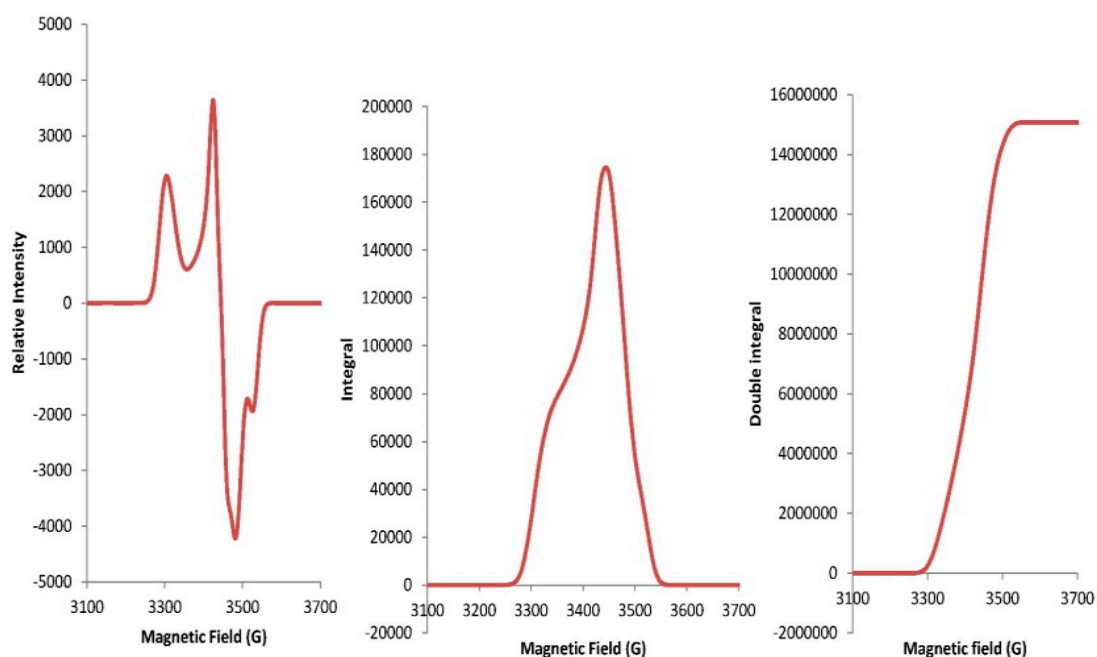

**Figure S3.** Left: Simulation (EasySpin) for the sum of signals for N1b, S1, and 2Fe<sub>2</sub>S from xanthine oxidoreductase. Middle: Integral using Sumspc. Right: Double integral using Sumspc. Comparison with a signal from CuEDTA gives a concentration of 3  $\mu$ M each for N1b, S1, and the 2Fe<sub>2</sub>S signal for xanthine oxidoreductase.

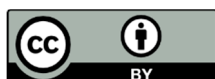

Supplement: s1 [file s1]
